# Supplementary material for: The Beneficial Fungus Mortierella hyalina Modulates Amino Acid Homeostasis in Arabidopsis under Nitrogen Starvation
Source: MDPI journal article supplement (doi:10.3390/ijms242216128), 2023-11-09
Supplement: s1 [file s1]

**Supplemental Table S1:** MGRL medium composition.

| Nutrients/Chemicals                                                                | MGRL/7mM NO <sub>3</sub> <sup>-</sup> | MGRL/0.25 mM NO <sub>3</sub> <sup>-</sup> | MGRL/0 mM NO <sub>3</sub> <sup>-</sup> |
|------------------------------------------------------------------------------------|---------------------------------------|-------------------------------------------|----------------------------------------|
| KNO <sub>3</sub>                                                                   | 3 mM                                  | 0.11 mM                                   | NA                                     |
| Ca(NO <sub>3</sub> ) <sub>2</sub> ·5H <sub>2</sub> O                               | 2 mM                                  | 0.07 mM                                   | NA                                     |
| KCl                                                                                | NA                                    | 2.89 mM                                   | 3 mM                                   |
| CaCl <sub>2</sub> ·2H <sub>2</sub> O                                               | NA                                    | 1.93 mM                                   | 2 mM                                   |
| Na <sub>2</sub> HPO <sub>4</sub> ·7H <sub>2</sub> O (pH=5.8)                       | 85.3 μM                               | 85.3 μM                                   | 85.3 μM                                |
| NaH <sub>2</sub> PO <sub>4</sub> ·H <sub>2</sub> O (pH=5.8)                        | 1.67 mM                               | 1.67 mM                                   | 1.67 mM                                |
| MgSO <sub>4</sub> ·7H <sub>2</sub> O                                               | 1.5 mM                                | 1.5 mM                                    | 1.5 mM                                 |
| Na <sub>2</sub> -EDTA·2H <sub>2</sub> O                                            | 67 μM                                 | 67 μM                                     | 67 μM                                  |
| H <sub>3</sub> BO <sub>3</sub>                                                     | 30 μM                                 | 30 μM                                     | 30 μM                                  |
| MnSO <sub>4</sub> ·7H <sub>2</sub> O                                               | 10.3 μM                               | 10.3 μM                                   | 10.3 μM                                |
| FeSO <sub>4</sub> ·7H <sub>2</sub> O                                               | 8.6 μM                                | 8.6 μM                                    | 8.6 μM                                 |
| CuSO <sub>4</sub> ·5H <sub>2</sub> O                                               | 1 μM                                  | 1 μM                                      | 1 μM                                   |
| CoCl <sub>2</sub> ·6H <sub>2</sub> O                                               | 130 nM                                | 130 nM                                    | 130 nM                                 |
| (NH <sub>4</sub> ) <sub>6</sub> Mo <sub>7</sub> O <sub>24</sub> ·4H <sub>2</sub> O | 24 nM                                 | 24 nM                                     | 24 nM                                  |
| ZnSO <sub>4</sub> ·7H <sub>2</sub> O                                               | 1 μM                                  | 1 μM                                      | 1 μM                                   |
| Sucrose                                                                            | 1.0% w/v                              | 1.0% w/v                                  | 1.0% w/v                               |
| Gelrite™                                                                           | 0.5% w/v                              | 0.5% w/v                                  | 0.5% w/v                               |

**Supplemental Table S2:** Oligonucleotides used for quantitative RT-PCR.

| Primer name       | Sequence 5' → 3'       | Targets   |
|-------------------|------------------------|-----------|
| AtNRT2.4 forward  | CAGTTCCTTCCGACTCATCA   | AT5G60770 |
| AtNRT2.4 reverse  | GCAACACCAGCATTTCGAC    | AT5G60770 |
| AtNRT2.5 forward  | CTCCTCCCTGTTATCCGTGAAA | AT1G12940 |
| AtNRT2.5 reverse  | AGACGAAAGTGGCGAGAGAGAA | AT1G12940 |
| AtActin 2 forward | GGAATCCACGAGACAACCTA   | AT3G18780 |
| AtActin 2 reverse | ATCTTCATGCTGCTTGGTGC   | AT3G18780 |

A1

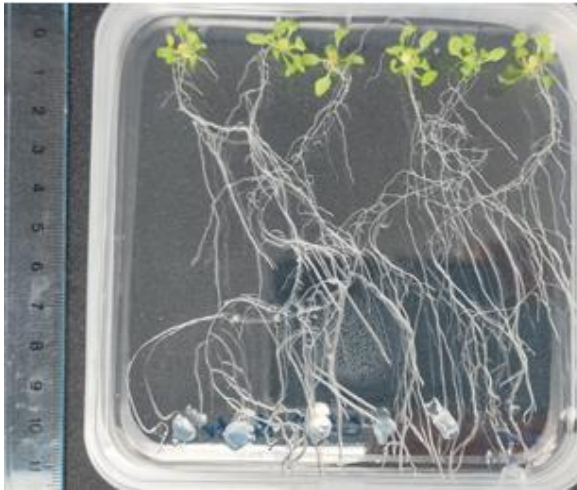

B1

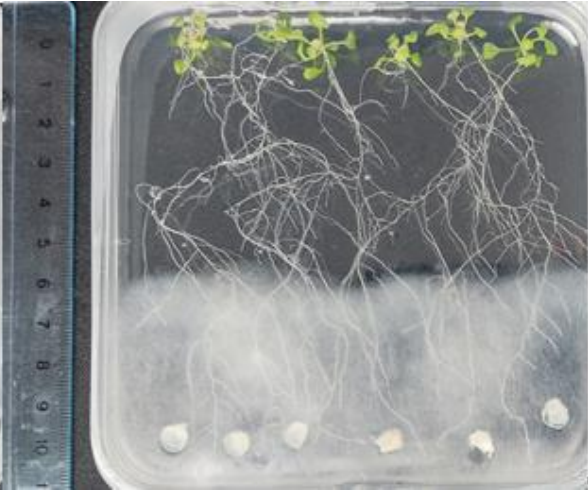

A2

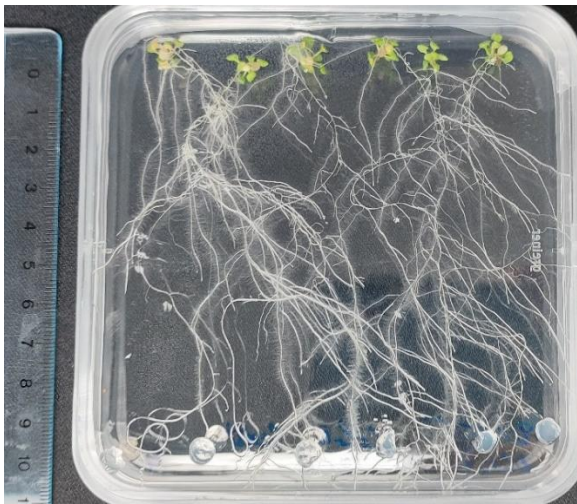

B2

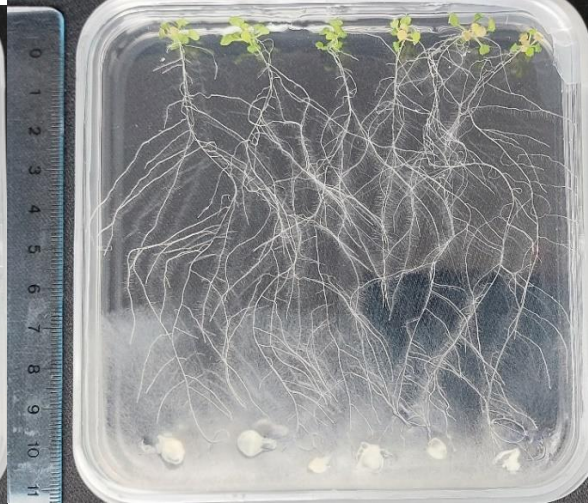

**Supplemental Figure S1.** Co-cultivation of *Arabidopsis thaliana* Col-0 plants with *Mortierella hyalina*: 20-day-old-plants (6 day after co-cultivation) growth on MGRL medium containing 7mM (A1, B1) or 0 mM (A2, B2)  $\text{NO}_3^-$ . Control plants (A), co-cultivated with *M. hyalina* (B); see control and fungal plugs at the bottom.

A

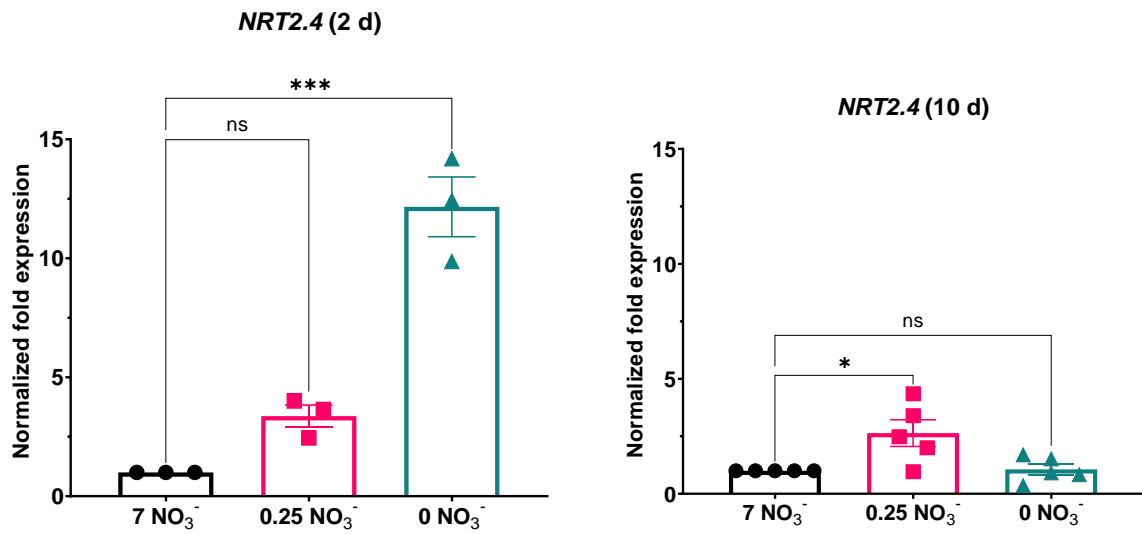

B

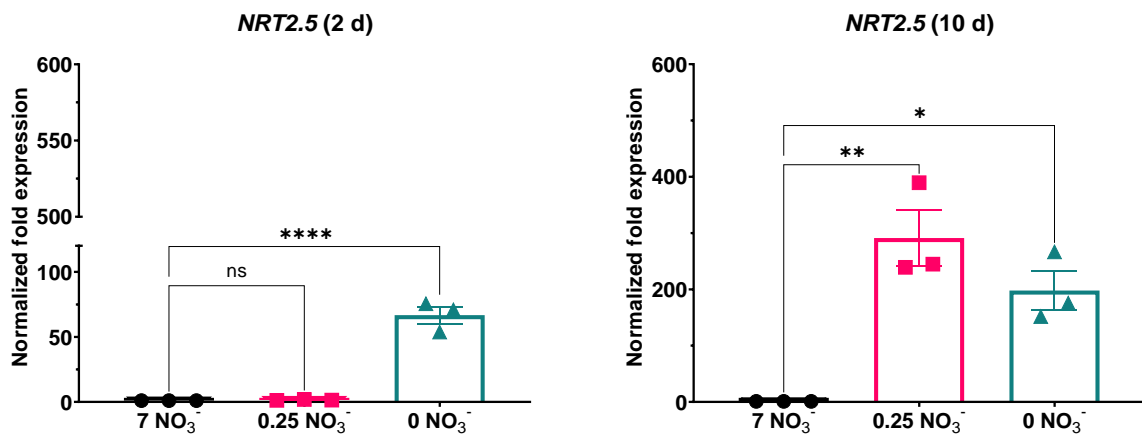

**Supplemental Figure S2.** *NRT2.4* (A) and *NRT2.5* (B) expression in roots of *Arabidopsis thaliana* WT. Two-weeks-old seedlings pre-grown on full NO<sub>3</sub><sup>-</sup> (7 mM NO<sub>3</sub><sup>-</sup>) medium were further incubated on different NO<sub>3</sub><sup>-</sup> medium (N-free, 0 mM NO<sub>3</sub><sup>-</sup>; N-low, 0.25 mM NO<sub>3</sub><sup>-</sup>; or N-complete, 7 mM NO<sub>3</sub><sup>-</sup>). One-way ANOVA with Dunnett's multiple comparisons test; the error bars indicate standard error of the mean (SEM); (n = 3–5); \*P<0.05; \*\*P<0.01; \*\*\* P<0.001; \*\*\*\* P<0.0001; ns: not significant.
